# Supplementary material for: Somatization symptoms—prevalence and risk, stress and resilience factors among medical and dental students at a mid-sized German university
Source: PeerJ journal article supplement (doi:10.7717/peerj.13803), 2022-08-19

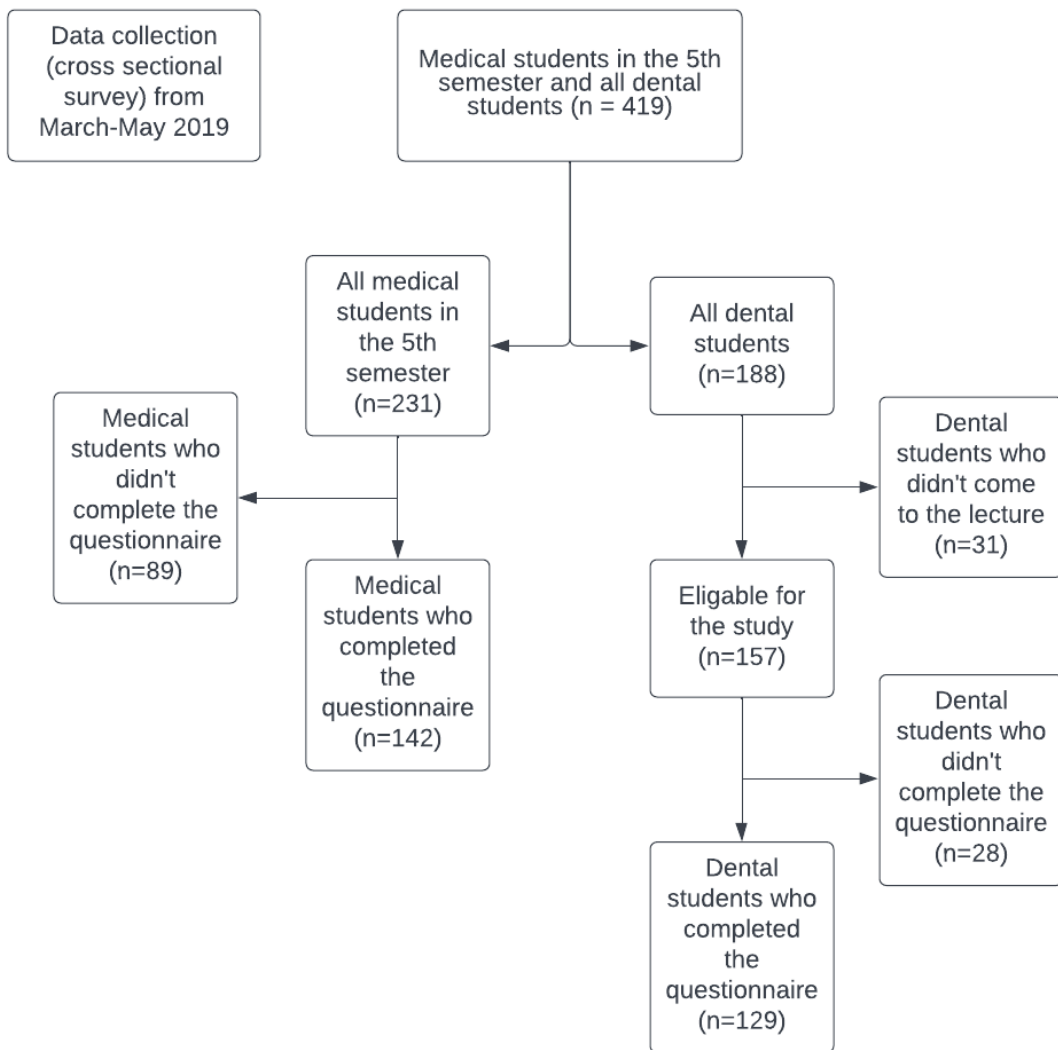

Supplement: Supplemental_figure_1.pdf [file Supplemental_figure_1.pdf]
